# Supplementary material for: The p22 RNA Silencing Suppressor of the Crinivirus Tomato chlorosis virus is Dispensable for Local Viral Replication but Important for Counteracting an Antiviral RDR6-Mediated Response during Systemic Infection
Source: Viruses. 2016 Jun 28;8(7):182. doi: 10.3390/v8070182 (PMC4974517; doi:10.3390/v8070182)

# Supplementary Materials: The p22 RNA Silencing Suppressor of the Crinivirus *Tomato chlorosis virus* is Dispensable for Local Viral Replication but Important for Counteracting an Antiviral RDR6-Mediated Response during Systemic Infection

Yazmín Landeo-Ríos, Jesús Navas-Castillo, Enrique Moriones and M. Carmen Cañizares \*

Table S1. Nucleotide sequences of primers used in this work.

| Gene/cDNA Clone | Primer       | Primer Sequence (5'–3') <sup>1</sup>           | Primer Position <sup>1,2</sup> |
|-----------------|--------------|------------------------------------------------|--------------------------------|
| ToCV-RNA1 clone | MA 1543 (FW) | AACTGCAGAGCCATTGACA                            | 6907–6926                      |
|                 | MA 1544 (RV) | <i>TTGAATATTAACCAGA/ACTGACCTAAATAACAACAGTC</i> | 8259–8244/7661–7640            |
|                 | MA 1545 (FW) | <i>ATTTAGGTCAGT/TCTGGTTAATATTCAAAGGATGG</i>    | 7650–7661/8244–8266            |
|                 | MA 1546 (RV) | GATCTGCAGGTCGACTCTAG                           | 8620–8601                      |
| ToCV-RNA2 clone | MA 1178 (FW) | ACCGGGCGCAGTTCATACAA                           | 1522–1541                      |
|                 | MA 1179 (RV) | CCGACAAGAAACAGCGCTCC                           | 1697–1675                      |
| CAC             | MA 1279 (FW) | CTCCGTTGTGATGTAAGTGG                           | 779–798                        |
|                 | MA 1280 (RV) | ATTGGTGGAAAGTAACATCATC                         | 950–929                        |

<sup>1</sup> The underlined sequences are restriction endonucleases sites introduced into the primers for cloning (*Pst* I in MA 1543 and MA 1546). Nucleotides in bold indicate overlapping sequences. Nucleotide sequences in italics and positions separated with the slash symbol (/) indicate the p22 flanking sequences. FW and RV indicate forward and reverse sense primers, respectively; <sup>2</sup> Primer positions indicate the positions in the RNA1 and RNA2 nucleotide sequences of AT80/99 ToCV isolate (GenBank accession numbers DQ983480 and DQ136146, respectively) and the CAC gene of Solanaceae (GenBank accession number XM\_009783969.1) used as internal standard.

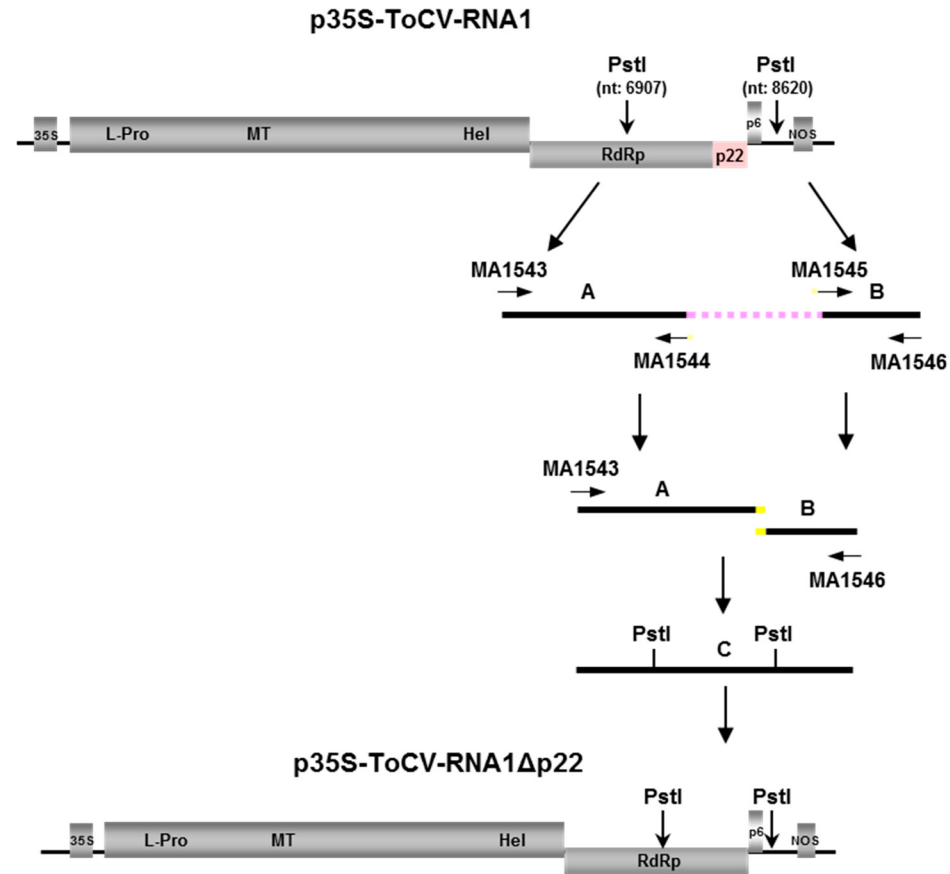

**Figure S1:** Diagram of the methodology used to create the p22-deficient ToCV RNA1 mutant clone.

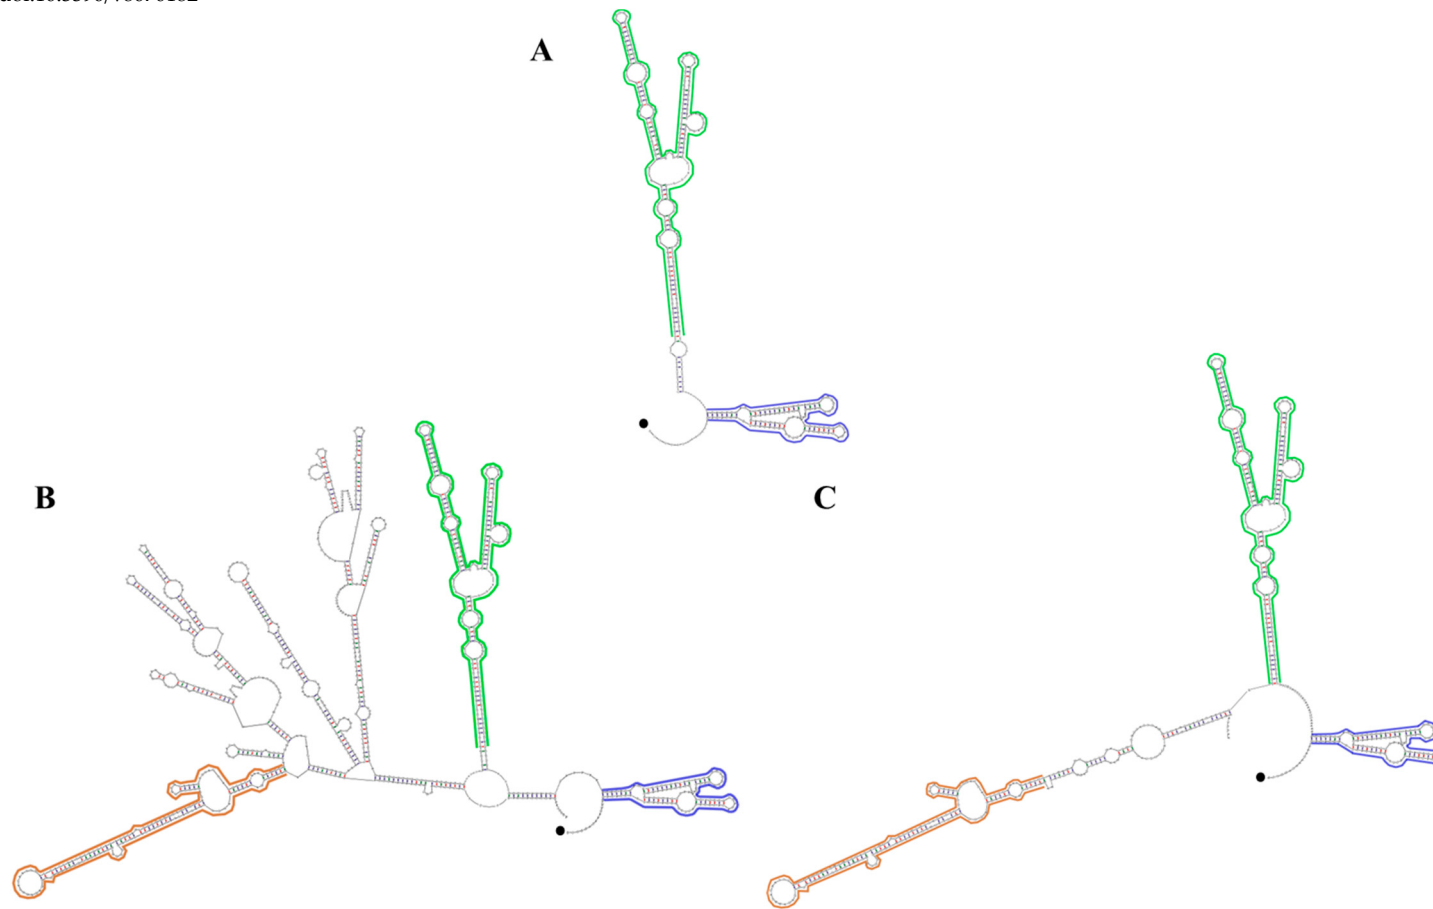

**Figure S2.** Lowest free energy secondary structure prediction of 3'-ends of the coding strand of ToCV RNA1. (A) Predicted secondary structure of the entire 3'-UTR (nt: 8237-8594); (B) Predicted secondary structure of the 3'-end comprising the 3'-UTR, the p22 sequence and the 241 nt located before the p22 sequence (nt: 7421-8594); (C) Predicted secondary structure of the 3'-end comprising the 3'-UTR and the 241 nt located before the p22 sequence (nt: 7421-7662 and 8237-8594). Identical stem loops are highlighted with similar colors. The 3'-end of each structure is indicated with (•). The RNAs were folded using the mfold program (Zuker, 2003).

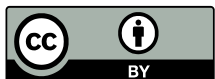

Supplement: Supplementary file 1 [file viruses-08-00182-s001.pdf]
